# Supplementary material for: Representing nighttime and minimum conductance in CLM4.5: global hydrology and carbon sensitivity analysis using observational constraints
Source: Copernicus journal article supplement (doi:10.5194/gmd-10-321-2017), 2017-01-23
Supplement: Supplementary file 1 [file gmd-10-321-2017-supplement.zip]

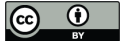

## *Supplement of*

# **Representing nighttime and minimum conductance in CLM4.5: global hydrology and carbon sensitivity analysis using observational constraints**

**Danica L. Lombardozzi et al.**

*Correspondence to:* Danica L. Lombardozzi (dll@ucar.edu)

- [gmd-10-321-2017-supplement-title-page.pdf](#)
- Supplemental
  - [SIFig1\\_Diurnal.pdf](#)
  - [SIFig2\\_SDs.pdf](#)
  - [SIFig3\\_MedianHydrology.pdf](#)
  - [SIFig4\\_MedianGPP.pdf](#)
  - [Supplementary Table 1 v4\\_FinalForRevision\\_MZ.pdf](#)

The copyright of individual parts of the supplement might differ from the CC-BY 3.0 licence.
