# Supplementary material for: Representing nighttime and minimum conductance in CLM4.5: global hydrology and carbon sensitivity analysis using observational constraints
Source: Copernicus journal article supplement (doi:10.5194/gmd-10-321-2017), 2017-01-23
Supplement: Supplementary file 2 [file gmd-10-321-2017-supplement.zip]

Archive with 7 entries (6 files):
- Supplemental/
- Supplemental/Supplementary Table 1 v4_FinalForRevision_MZ.pdf
- Supplemental/SIFig1_Diurnal.pdf
- Supplemental/SIFig3_MedianHydrology.pdf
- Supplemental/SIFig2_SDs.pdf
- Supplemental/SIFig4_MedianGPP.pdf
- gmd-10-321-2017-supplement-title-page.pdf
