# Supplementary material for: Representing nighttime and minimum conductance in CLM4.5: global hydrology and carbon sensitivity analysis using observational constraints
Source: Copernicus journal article supplement (doi:10.5194/gmd-10-321-2017), 2017-01-23
Supplement: Supplementary file 2 [file gmd-10-321-2017-supplement.zip › Supplemental/SIFig1_Diurnal.pdf]

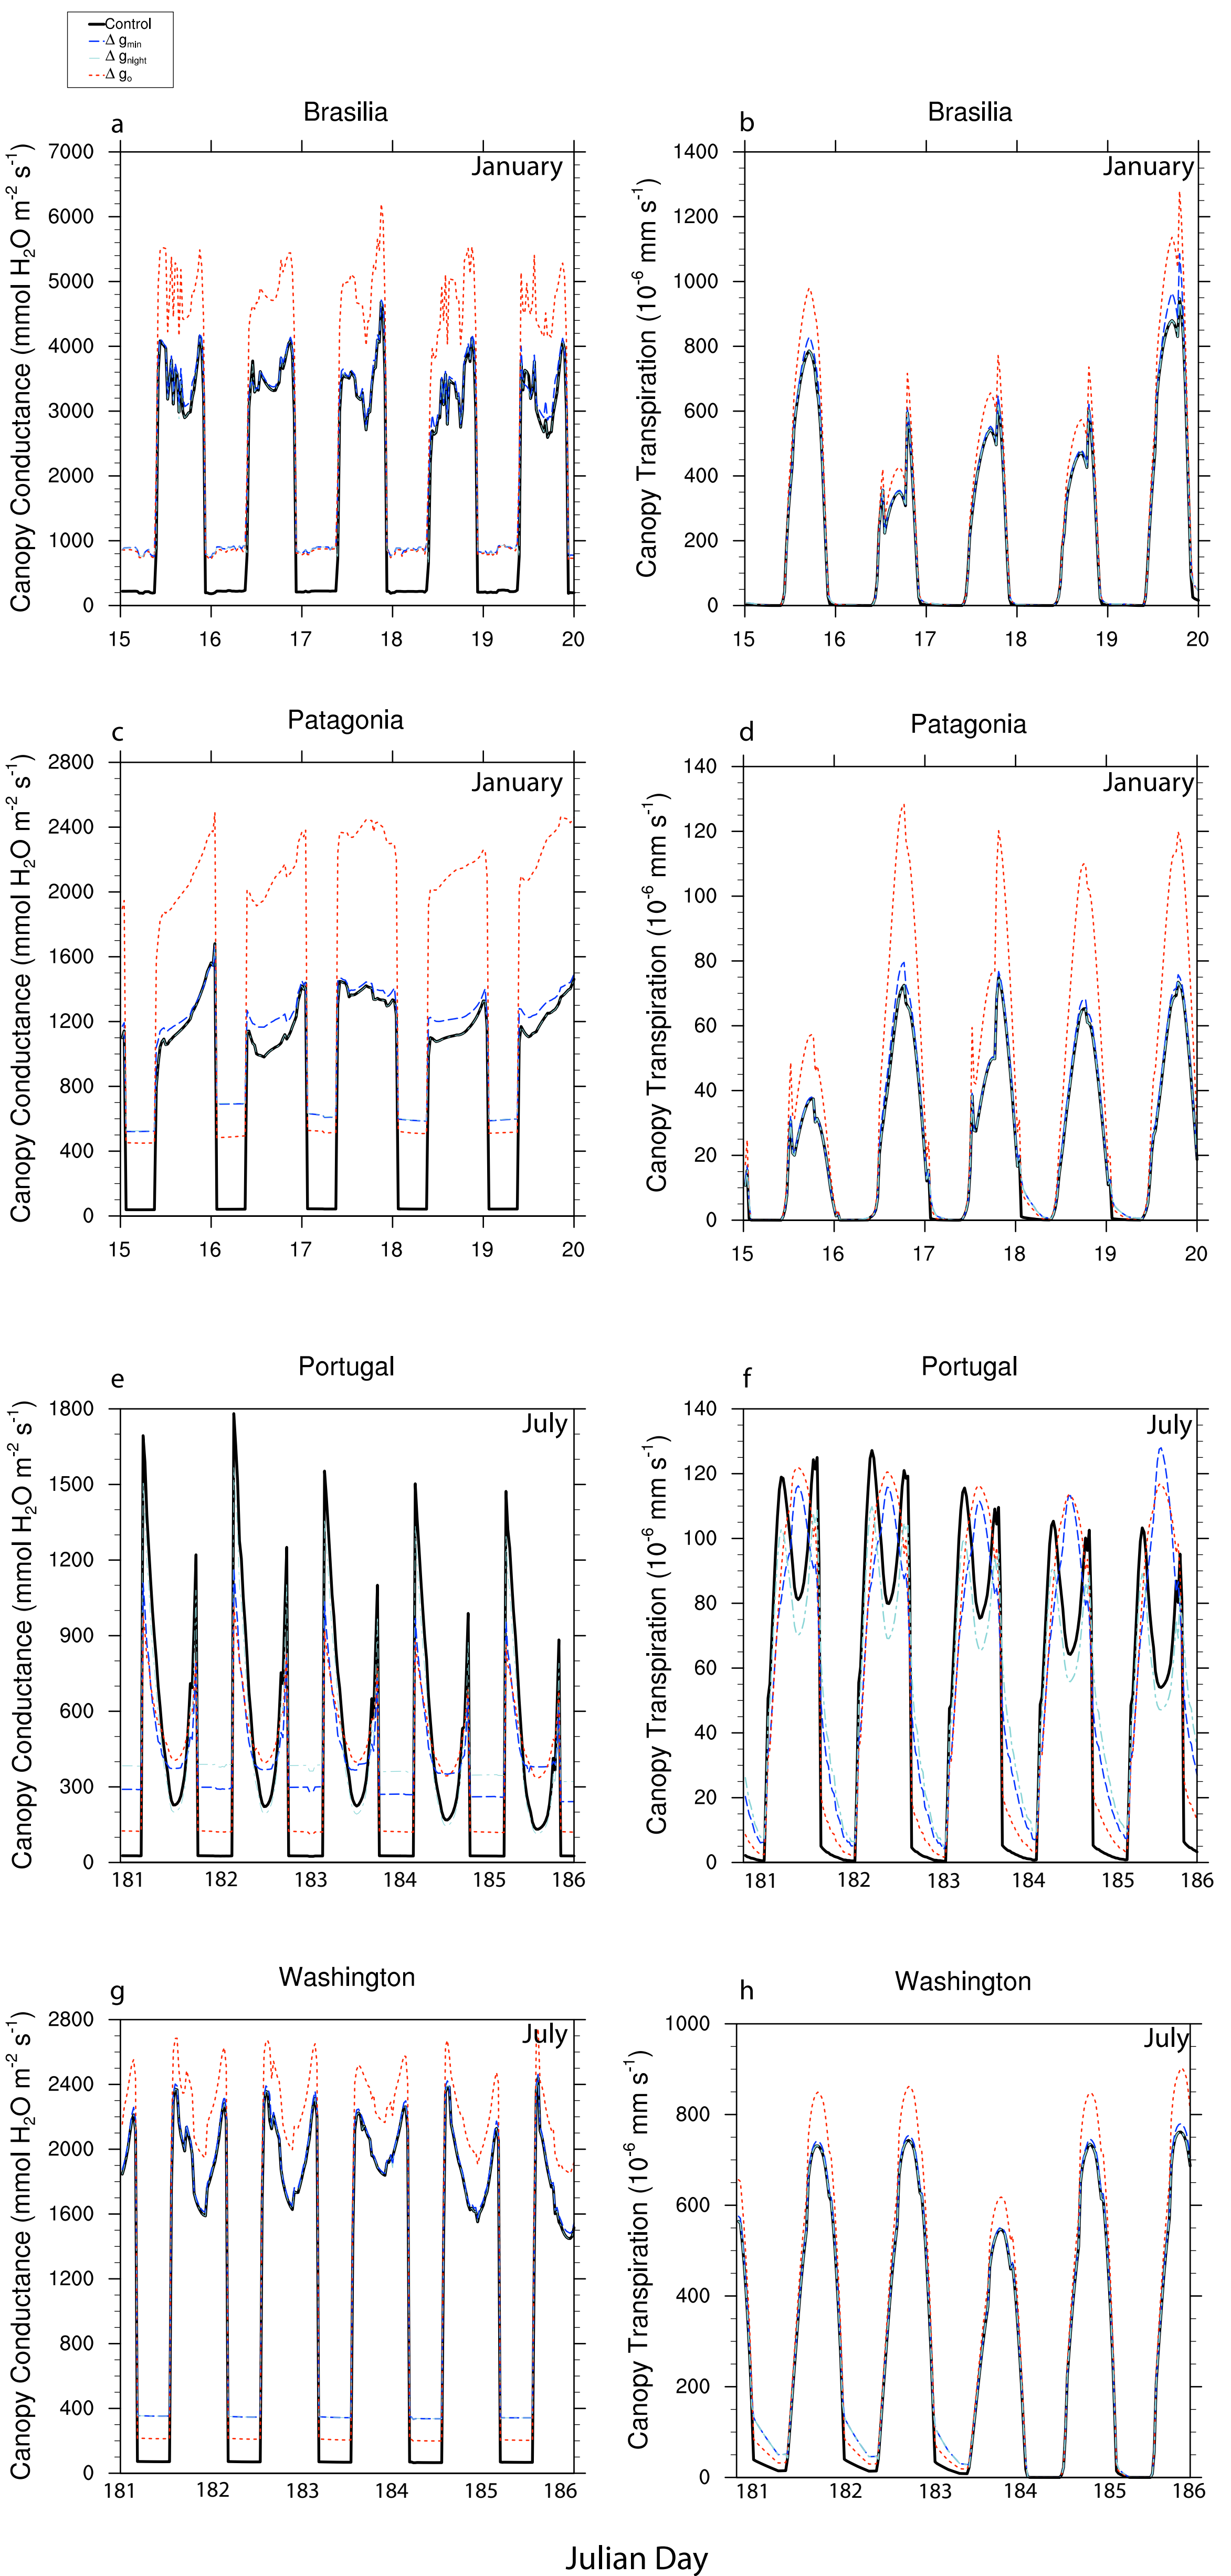

**SI Figure 1.** Diurnal time-series of canopy conductance (a,c,e,g) and transpiration (b,d,f,h) for Brasilia and Patagonia over five days in mid-January (a-d) and for Portugal and Washington over five days in mid-July (e-h).
