# Supplementary material for: Representing nighttime and minimum conductance in CLM4.5: global hydrology and carbon sensitivity analysis using observational constraints
Source: Copernicus journal article supplement (doi:10.5194/gmd-10-321-2017), 2017-01-23
Supplement: Supplementary file 2 [file gmd-10-321-2017-supplement.zip › Supplemental/SIFig3_MedianHydrology.pdf]

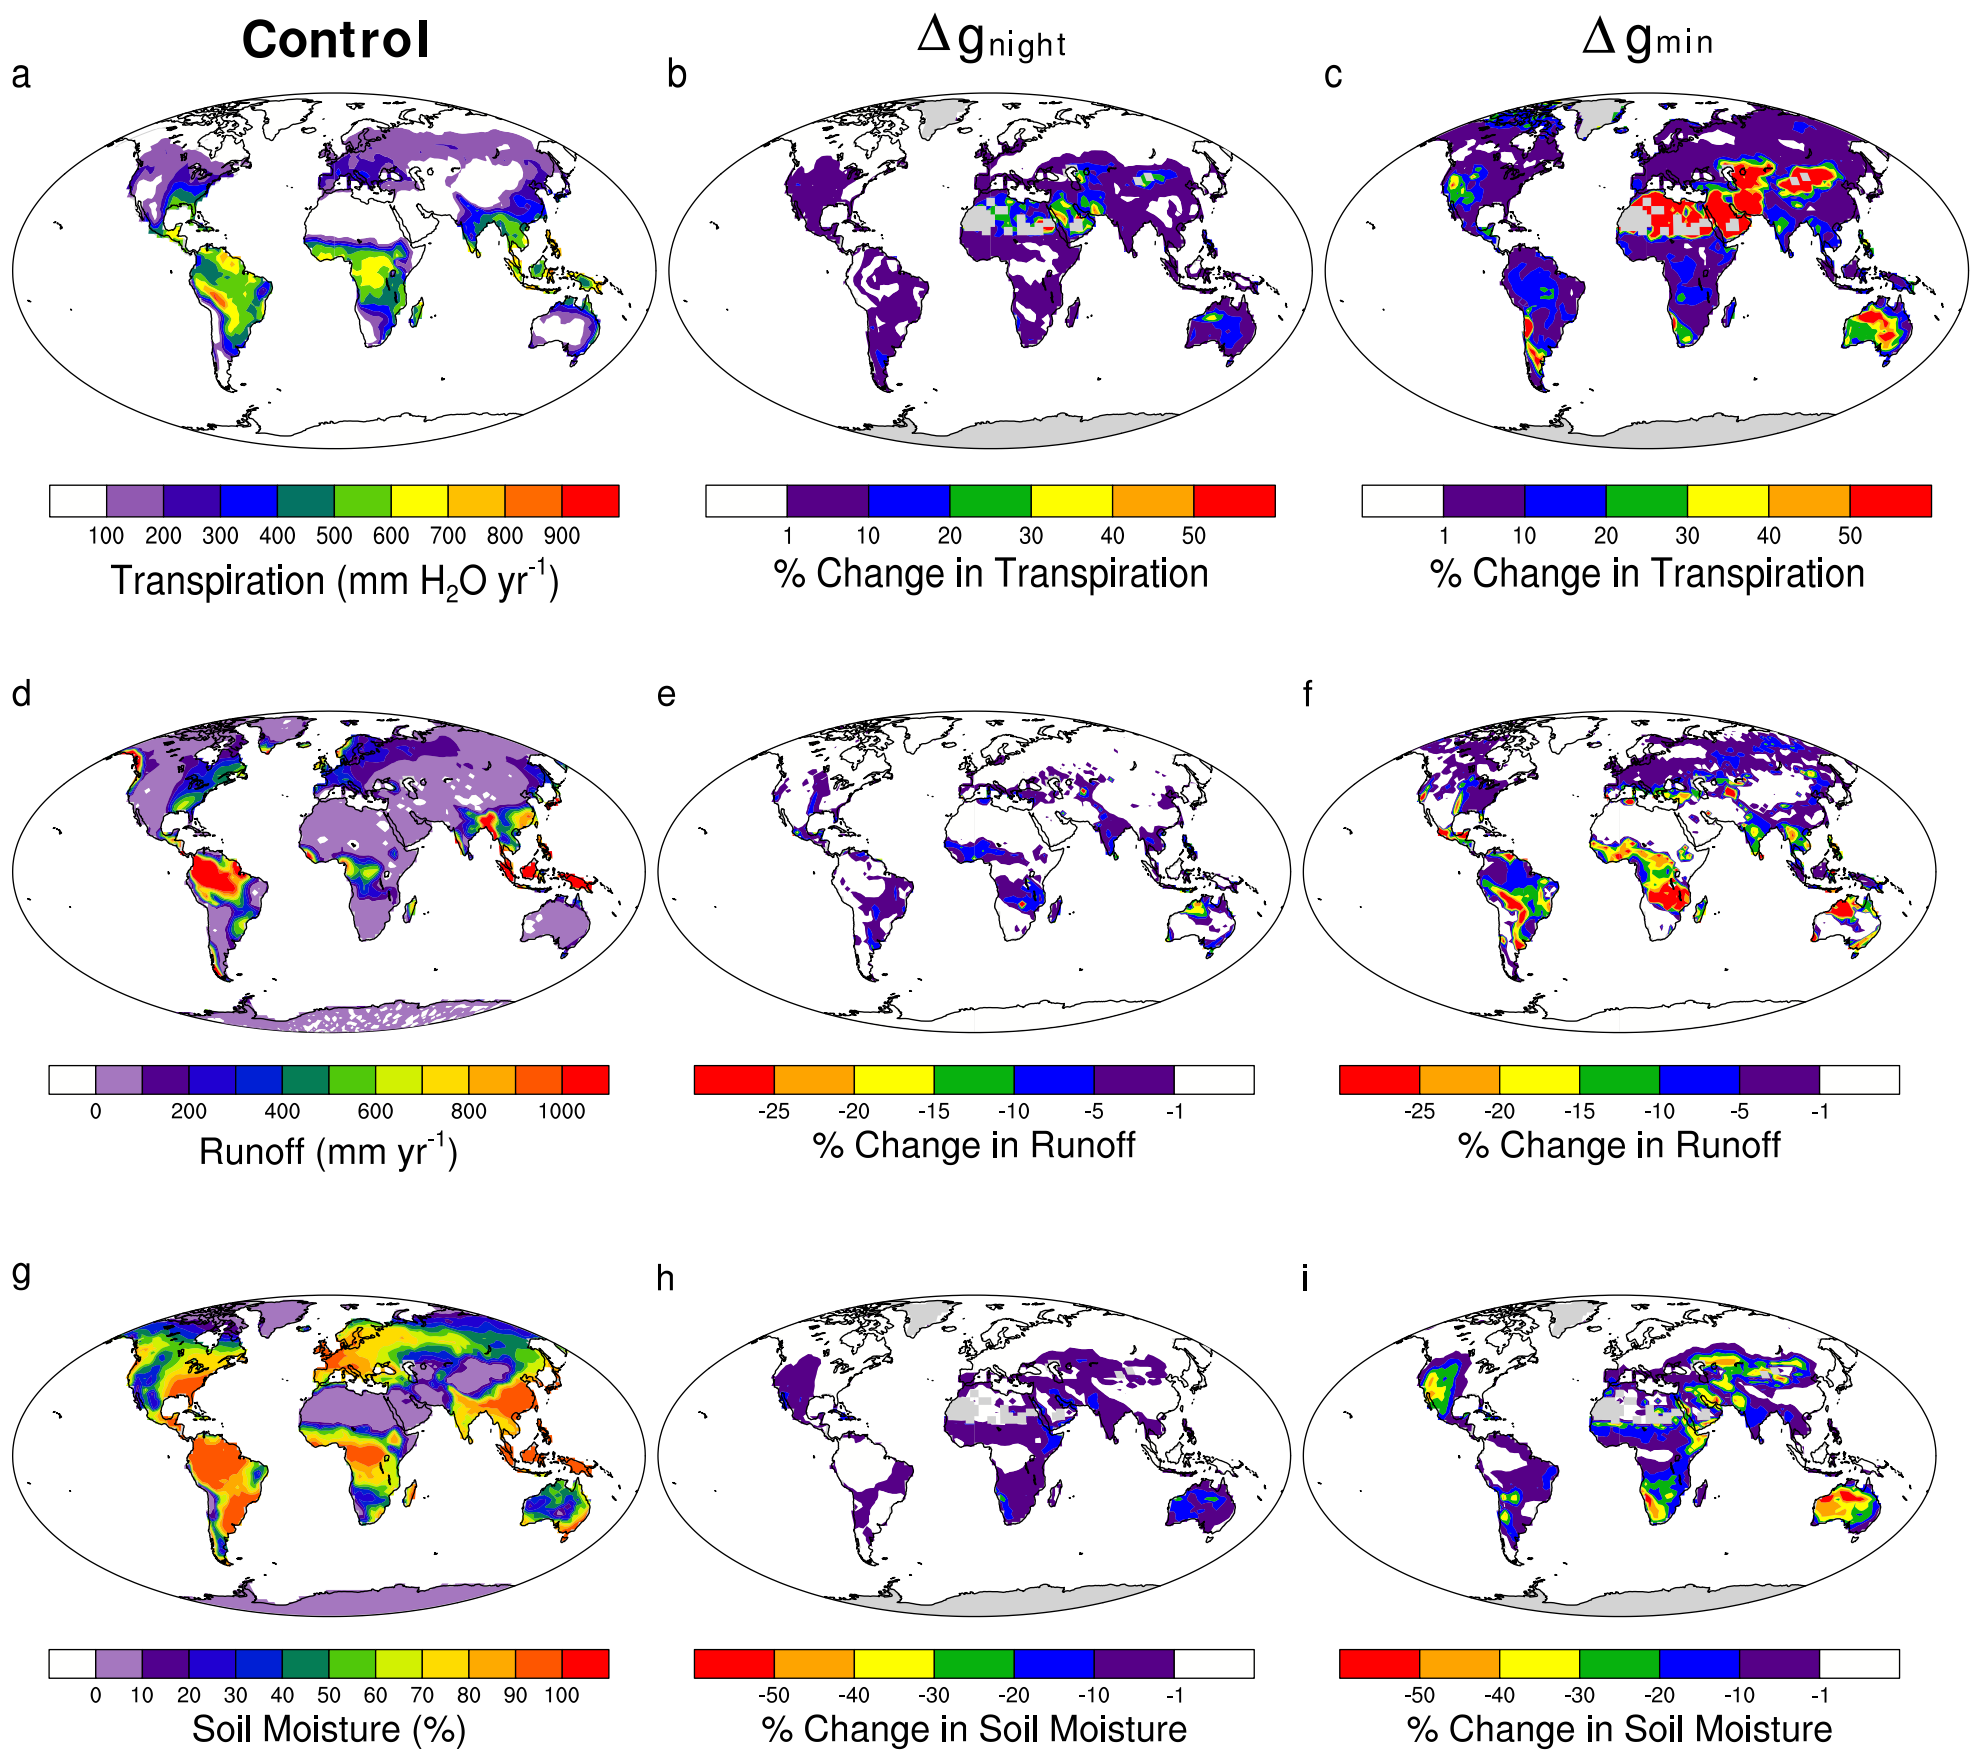

**SI Figure 3.** Simulated average transpiration (a), runoff (d), and soil moisture (g) for a control simulation; and percent change from control in transpiration (b-c), runoff (e-f), and soil moisture (h-i) after including a nighttime threshold ( $\Delta g_{\text{night}}$ ; b,e,h) or a minimum  $g_s$  threshold ( $\Delta g_{\text{min}}$ ; c,f,i) based on median observational  $g_{s,n}$  values. Note that both nighttime and minimum thresholds were adjusted based on a soil moisture scalar.
