# Supplementary material for: Representing nighttime and minimum conductance in CLM4.5: global hydrology and carbon sensitivity analysis using observational constraints
Source: Copernicus journal article supplement (doi:10.5194/gmd-10-321-2017), 2017-01-23
Supplement: Supplementary file 2 [file gmd-10-321-2017-supplement.zip › Supplemental/SIFig4_MedianGPP.pdf]

# Control

# $\Delta g_{\text{night}}$

# $\Delta g_{\text{min}}$

a

b

c

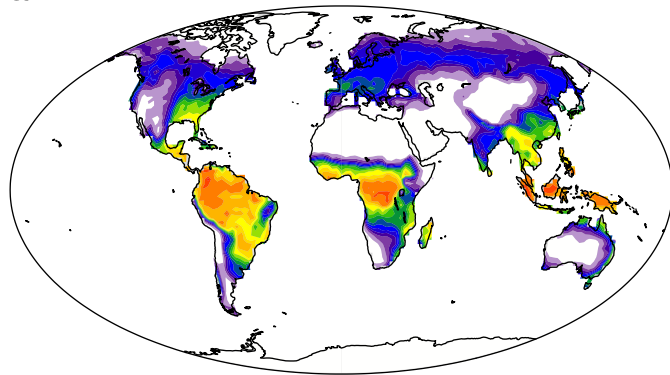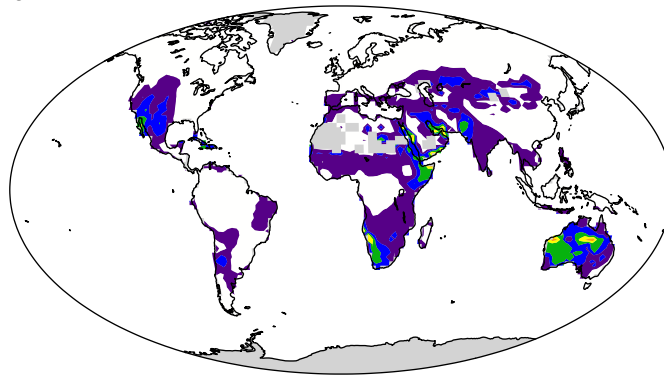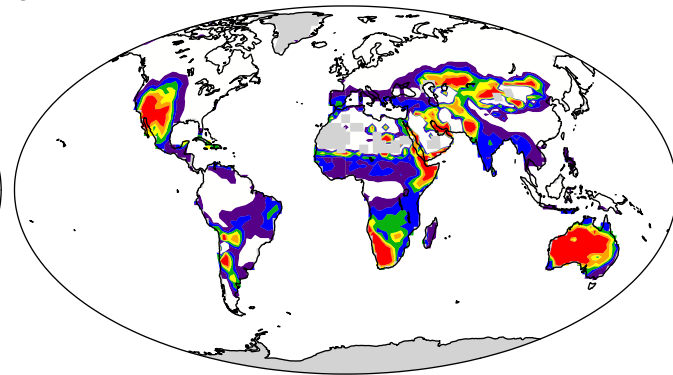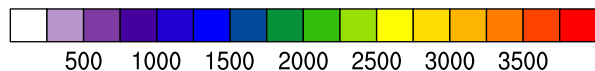

GPP ( $\text{g C m}^{-2} \text{ yr}^{-1}$ )

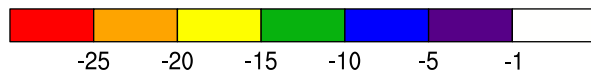

% Change in GPP

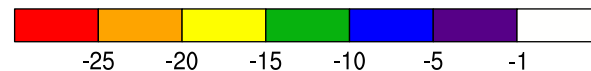

% Change in GPP

**SI Figure 4.** Average gross primary productivity (GPP) for a control simulation (a), and percent change from control (b-c) after including a nighttime threshold ( $\Delta g_{\text{night}}$ ; b) or a minimum  $g_s$  threshold ( $\Delta g_{\text{min}}$ ; c) based on median values of observational  $g_{s,n}$  data.
