# Supplementary material for: Representing nighttime and minimum conductance in CLM4.5: global hydrology and carbon sensitivity analysis using observational constraints
Source: Copernicus journal article supplement (doi:10.5194/gmd-10-321-2017), 2017-01-23
Supplement: Supplementary file 2 [file gmd-10-321-2017-supplement.zip › Supplemental/Supplementary Table 1 v4_FinalForRevision_MZ.pdf]

Supplementary Table 1: Species listed were assigned a Plant Functional Type (PFT) based on physiological characteristics. Values for Night  $g_s$  ( $\text{mmol m}^{-2}\text{s}^{-1}$ ), Days  $g_s$  ( $\text{mmol m}^{-2}\text{s}^{-1}$ ), Night:Day  $g_s$  (%) and Precipitation reported as annual mean unless a range was also reported. Values followed by “†” were estimated from published graphs. For values of the ratio of night to day, **Night:day (%)**, “\*\*”, indicates the ratio is reported in the citation. For method, the following abbreviations were used: “dp” = diffusion porometer; “ge” = gas exchange; “IRGA” = infra-red gas analyser; “Li-1600” & “Li-1600C” = models of the Li-1600 steady state porometer; “Li-6400”, =Li-6400 gas exchange system; “ssp” = steady state porometer; “wg” = Whole plant gas exchange. For **location**, the following abbreviations were used: “cg” = common garden; “f” = field; “gc” = growth chamber; “gh” = glasshouse; “oc” = open air chambers; “op” = outdoor pots; “rs” = rain exclusion shelter. \*\* denotes that the values were excluded from the PFT means presented in SI Table 2, and were subsequently not used in the model.

| PFT                                    | Species                       | Night $g_s$<br>( $\text{mmol m}^{-2}\text{s}^{-1}$ ) | Day $g_s$<br>( $\text{mmol m}^{-2}\text{s}^{-1}$ ) | Night:<br>Day $g_s$<br>(%) | Precipitation<br>(mean, mm) | VPD<br>(kPa) | Method  | Location | Locality                      | Citation                                                           |
|----------------------------------------|-------------------------------|------------------------------------------------------|----------------------------------------------------|----------------------------|-----------------------------|--------------|---------|----------|-------------------------------|--------------------------------------------------------------------|
| Boreal needle-leaf evergreen           | <i>Abies alba</i>             | 8                                                    | 17.1                                               | 47                         | Well watered                |              | Li-1600 | oc       | Birmensdorf, Switzerland      | Keller and Hasler 1984, cited in Caird <i>et al.</i> , 2007        |
| Temperate broad-leaf evergreen         | <i>Acacia auriculiformis</i>  | 11                                                   |                                                    |                            | Well watered                |              | ssp     | gh       | Sydney, NSW, Australia        | Zeppel unpublished                                                 |
| Temperate broad-leaf Shrub - evergreen | <i>Acacia cultriformis</i>    | 77                                                   | 229.7                                              | 34                         | Well watered                |              | ssp     | gh       | Sydney, NSW, Australia        | Zeppel unpublished                                                 |
| Temperate broad-leaf Shrub - evergreen | <i>Acacia iteaphylla</i>      | 14.9                                                 | 138.9                                              | 11                         | Well watered                |              | ssp     | gh       | Sydney, NSW, Australia        | Zeppel unpublished                                                 |
| Temperate broad-leaf deciduous         | <i>Acer rubrum</i>            | 42.57                                                |                                                    |                            | 383- 1056                   |              | dp      | f, gh    | Ohio & Colorado, USA          | Barnard and Bauerle, 2013                                          |
| Temperate broad-leaf deciduous         | <i>Acer rubrum</i>            | 50                                                   | 120 †                                              |                            | 2550 (snow and rain)        |              | Li-6400 | f        | Petersham, Massachusetts, USA | Daley and Philips, 2006                                            |
| Temperate broad-leaf deciduous         | <i>Acer rubrum</i>            | 30.1                                                 | 130-355                                            | 5-25*                      | 1470                        |              | Li-1600 | f        | Upstate New York, USA         | Dawson <i>et al.</i> , 2007                                        |
| Temperate broad-leaf deciduous         | <i>Acer saccharum</i>         | 40.75                                                | 119-322                                            | 2-20*                      | 1470                        |              | Li-1600 | f        | Upstate New York, USA         | Dawson <i>et al.</i> , 2007                                        |
| C3 grass                               | <i>Achnatherum hymenoides</i> | 142                                                  | 194                                                | 73                         | 138                         |              | Li-6400 | f        | North America, USA            | Ogle <i>et al.</i> , 2012                                          |
| CAM plant **                           | <i>Aechmea lingulata</i>      | 113                                                  | 15 †                                               | 734                        |                             |              | ssp     | f        | Trinidad                      | Luttge <i>et al.</i> , 1986                                        |
| C3 grass                               | <i>Arabidopsis thaliana</i>   | 161                                                  | 258                                                | 62                         | Well watered                | 1.5          | wg      | gc       | France                        | Lasceve <i>et al.</i> , 1997, cited in Caird <i>et al.</i> , 2007  |
| C3 grass                               | <i>Arabidopsis thaliana</i>   | 236                                                  | 373                                                | 63                         | Well watered                | 70% RH       | wg      | gc       | France                        | Leymarie <i>et al.</i> , 1998, cited in Caird <i>et al.</i> , 2007 |
| C3 grass                               | <i>Arabidopsis thaliana</i>   | 116                                                  |                                                    |                            |                             |              | wg      | gc       |                               | M. Caird <i>et al.</i> , unpublished                               |
| C3 grass                               | <i>Arabidopsis thaliana</i>   | 194                                                  |                                                    |                            |                             |              | wg      | gc       |                               | M. Caird <i>et al.</i> ,                                           |

|                                        |                                  |     |        |       |      |  |         |    |                    |                                                          |
|----------------------------------------|----------------------------------|-----|--------|-------|------|--|---------|----|--------------------|----------------------------------------------------------|
|                                        |                                  |     |        |       |      |  |         |    |                    | unpublished                                              |
| C3 grass                               | <i>Arabidopsis thaliana</i>      | 231 |        |       |      |  | wg      | gc |                    | M. Caird <i>et al.</i> , unpublished                     |
| C3 grass                               | <i>Arabidopsis thaliana</i>      | 161 |        |       |      |  | wg      | gc |                    | M. Caird <i>et al.</i> , unpublished                     |
| C3 grass                               | <i>Arabidopsis thaliana</i>      | 187 |        |       |      |  | wg      | gc |                    | M. Caird <i>et al.</i> , unpublished                     |
| C3 grass                               | <i>Arabidopsis thaliana</i>      | 120 |        |       |      |  | wg      | gc |                    | M. Caird <i>et al.</i> , unpublished                     |
| C3 grass                               | <i>Arabidopsis thaliana</i>      | 214 |        |       |      |  | wg      | gc |                    | M. Caird <i>et al.</i> , unpublished                     |
| C3 grass                               | <i>Arabidopsis thaliana</i>      | 154 |        |       |      |  | wg      | gc |                    | M. Caird <i>et al.</i> , unpublished                     |
| C3 grass                               | <i>Arabidopsis thaliana</i>      | 293 |        |       |      |  | wg      | gc |                    | M. Caird <i>et al.</i> , unpublished                     |
| C3 grass                               | <i>Arabidopsis thaliana</i>      | 169 |        |       |      |  | wg      | gc |                    | M. Caird <i>et al.</i> , unpublished                     |
| C3 grass                               | <i>Arabidopsis thaliana</i>      | 199 |        |       |      |  | wg      | gc |                    | M. Caird <i>et al.</i> , unpublished                     |
| C3 grass                               | <i>Arabidopsis thaliana</i>      | 241 |        |       |      |  | wg      | gc |                    | M. Caird <i>et al.</i> , unpublished                     |
| C3 grass                               | <i>Arabidopsis thaliana</i>      | 12  |        |       |      |  | wg      | gc |                    | M. Caird <i>et al.</i> , unpublished                     |
| Temperate broad-leaf Shrub - evergreen | <i>Arctostaphylos glandulosa</i> | 24  | 22-244 | 5-15* | 1250 |  | Li-1600 | f  | Bolinas Ridge, USA | Dawson <i>et al.</i> , 2007                              |
| Temperate broad-leaf Shrub - evergreen | <i>Artemisia tridentata</i>      | 47  | 66     | 71    | 200  |  | Li-6400 | f  | North America, USA | Ogle <i>et al.</i> , 2012                                |
| Temperate broad-leaf Shrub - evergreen | <i>Artemisia tridentata</i>      | 30  |        |       |      |  | ge      | f  |                    | Howard, unpublished, cited in Caird <i>et al.</i> , 2007 |
| Temperate broad-leaf Shrub - evergreen | <i>Artemisia tridentata</i>      | 12  |        | 32    |      |  | Li-6400 | f  | California, USA    | Snyder <i>et al.</i> , 2003                              |
| Temperate broad-leaf Shrub - evergreen | <i>Atriplex confertifolia</i>    | 15  |        | 34    |      |  | Li-6400 | f  | California, USA    | Snyder <i>et al.</i> , 2003                              |
| Temperate broad-leaf Shrub - evergreen | <i>Atriplex parryi</i>           | 28  |        | 30    |      |  | Li-6400 | f  | California, USA    | Snyder <i>et al.</i> , 2003                              |

|                                         |                                   |       |        |      |                      |  |         |        |                               |                               |
|-----------------------------------------|-----------------------------------|-------|--------|------|----------------------|--|---------|--------|-------------------------------|-------------------------------|
| Temperate Annual Herb (Hemiparasite) ** | <i>Bartsia trixago</i>            | 1126  |        |      |                      |  | IRGA    | f      | Alcudia, Mallorca             | Press <i>et al.</i> , 1993    |
| Temperate broad-leaf deciduous          | <i>Betula nigra (Birch)</i>       | 51.24 |        |      | 383- 1056            |  | dp      | f, gh  | Ohio & Colorado, USA          | Barnard and Bauerle, 2013     |
| Temperate broad-leaf deciduous          | <i>Betula papyrifera</i>          | 170   | 258 †  | 66   | 2550 (snow and rain) |  | Li-6400 | f      | Petersham, Massachusetts, USA | Daley and Philips, 2006       |
| Temperate broad-leaf deciduous          | <i>Betula pendula</i>             | 90    | 183.6  | 49   | Well watered         |  | ge      | f, oc  | Birmensdorf, Switzerland      | Matyssek <i>et al.</i> , 1995 |
| Tropical broad-leaf evergreen           | <i>Blepharocalyx salicifolius</i> | 81    | 258 †  | 31   | 1500                 |  | ssp     | f      | Brasilia, Brasil              | Scholz <i>et al.</i> , 2007   |
| C4 grass                                | <i>Bouteloua curtipendula</i>     | 54    |        |      | 365                  |  | Li-6400 | f      | North America, USA            | Ogle <i>et al.</i> , 2012     |
| C4 grass                                | <i>Bouteloua curtipendula</i>     | 54.3  | 118    | 46   | 365                  |  | Li-6400 | f      | North America, USA            | Ogle <i>et al.</i> , 2012     |
| C3 grass                                | <i>Bromus rigidus</i>             | 61    | 409    | 15   |                      |  | IRGA    | f      | Alcudia, Mallorca             | Press <i>et al.</i> , 1993    |
| Temperate broad-leaf deciduous          | <i>Carpinus betula/betulus</i>    | 61.78 |        |      | 383- 1056            |  | dp      | f, gh  | Ohio & Colorado, USA          | Barnard and Bauerle, 2013     |
| Temperate broad-leaf Shrub - evergreen  | <i>Ceanothus cuneatus</i>         | 0.6   | 48-326 | 0-1* | 1290                 |  | Li-1600 | f      | Bolinas Ridge, USA            | Dawson <i>et al.</i> , 2007   |
| Temperate broad-leaf deciduous          | <i>Cercis canadensis</i>          | 26.58 |        |      | 383- 1056            |  | dp      | f, gh  | Ohio & Colorado, USA          | Barnard and Bauerle, 2013     |
| Temperate broad-leaf shrub - deciduous  | <i>Chrysothamnus nauseosus</i>    | 450   | 1200   | 38   | Well watered         |  | Li-6400 | gh     | Athens, USA                   | Donovan <i>et al.</i> , 1999  |
| Temperate broad-leaf shrub - deciduous  | <i>Chrysothamnus nauseosus</i>    | 230   | 600 †  | 38   | 163                  |  | Li-6400 | f      | Mono Lake, California, USA    | Donovan <i>et al.</i> , 2003  |
| Tropical CAM Evergreen Tree**           | <i>Clusia alata</i>               | 22    | 36     | 52*  | Well watered         |  | ssp     | gh, gc | Sierra San Luis, Venezuela    | Franco <i>et al.</i> , 1990   |
| Tropical CAM Evergreen Tree**           | <i>Clusia major</i>               | 18    | 74     | 25*  | Well watered         |  | ssp     | gh, gc | Sierra San Luis, Venezuela    | Franco <i>et al.</i> , 1990   |
| Tropical C3-CAM Evergreen Tree**        | <i>Clusia minor</i>               | 17    | 66     | 25*  | Well watered         |  | ssp     | gh, gc | Sierra San Luis, Venezuela    | Franco <i>et al.</i> , 1990   |
| Tropical C3-CAM Evergreen Tree**        | <i>Clusia venosa</i>              | 2.6   | 58     | 4.5* | Well watered         |  | ssp     | gh, gc | Sierra San Luis, Venezuela    | Franco <i>et al.</i> , 1990   |
| Temperate needle-leaf                   | <i>Dacrydium cupressinum</i>      | 5     |        |      | 1190                 |  | Li-6400 | f      | New York, USA                 | Barbour <i>et al.</i> , 2005  |

|                                |                                 |     |       |    |              |           |                   |    |                             |                               |
|--------------------------------|---------------------------------|-----|-------|----|--------------|-----------|-------------------|----|-----------------------------|-------------------------------|
| evergreen                      |                                 |     |       |    |              |           |                   |    |                             |                               |
| C3 monocot rosette**           | <i>Dasyilirion leiophyllum</i>  | 2   | 88    | 2  | 365          |           | Li-6400           | f  | North America, USA          | Ogle <i>et al.</i> , 2012     |
| C4 grass                       | <i>Distichlis spicata</i>       | 35  |       | 30 |              |           | Li-6400           | f  | California, USA             | Snyder <i>et al.</i> , 2003   |
| C4 grass                       | <i>Eragrostis lehmanniana</i>   | 43  | 88    | 49 | 365          |           | Li-6400           | f  | North America, USA          | Ogle <i>et al.</i> , 2012     |
| Temperate broad-leaf evergreen | <i>Eucalyptus argophloia</i>    | 27  | 100 † | 27 | 801 +19%     |           | Li-6400           | cg | Richmond, NSW, Australia    | Lewis <i>et al.</i> , 2011    |
| Temperate broad-leaf evergreen | <i>Eucalyptus camaldulensis</i> | 31  | 200 † | 16 | 801 +19%     |           | Li-6400           | cg | Richmond, NSW, Australia    | Lewis <i>et al.</i> , 2011    |
| Temperate broad-leaf evergreen | <i>Eucalyptus camaldulensis</i> | 29  | 223 † | 13 | Well watered |           | ssp               | gh | Sydney, NSW, Australia      | Zeppel unpublished            |
| Temperate broad-leaf evergreen | <i>Eucalyptus dunnii</i>        | 12  | 138 † | 9  | 801 +19%     |           | Li-6400           | cg | Richmond, NSW, Australia    | Lewis <i>et al.</i> , 2011    |
| Temperate broad-leaf evergreen | <i>Eucalyptus globulus</i>      | 27  | 175 † | 15 | Well watered |           | ssp               | gh | Sydney, NSW, Australia      | Zeppel unpublished            |
| Temperate broad-leaf evergreen | <i>Eucalyptus grandis</i>       | 104 |       |    | 570          |           | sap flow          | cg | Wagga Wagga, NSW, Australia | Benyon, 1999                  |
| Temperate broad-leaf evergreen | <i>Eucalyptus grandis</i>       | 54  | 223 † | 24 | 801 +19%     |           | Li-6400           | cg | Richmond, NSW, Australia    | Lewis <i>et al.</i> , 2011    |
| Temperate broad-leaf evergreen | <i>Eucalyptus grandis</i>       | 33  | 510   | 6  | Well watered |           | Li-6400, sap flow | cg | Richmond, NSW, Australia    | Phillips <i>et al.</i> , 2010 |
| Temperate broad-leaf evergreen | <i>Eucalyptus saligna</i>       | 50  |       |    | Well watered |           | Li-6400, sap flow | cg | Richmond, NSW, Australia    | Phillips <i>et al.</i> , 2010 |
| Temperate broad-leaf evergreen | <i>Eucalyptus sideroxylon</i>   | 20  | 279 † | 7  | 801 +19%     |           | Li-6400           | cg | Richmond, NSW, Australia    | Lewis <i>et al.</i> , 2011    |
| Temperate broad-leaf evergreen | <i>Eucalyptus sideroxylon</i>   | 120 | 144   | 34 | Well watered | 0.4-2.5   | ssp               | gh | Richmond, NSW, Australia    | Zeppel <i>et al.</i> , 2012   |
| Temperate broad-leaf evergreen | <i>Eucalyptus sideroxylon</i>   | 29  | 151   | 19 | Well watered |           | ssp               | gh | Sydney, NSW, Australia      | Zeppel unpublished            |
| Temperate broad-leaf evergreen | <i>Eucalyptus tereticornis</i>  | 30  | 1200  |    | Well watered | 0.51-1.27 | Li-6400           | gh | Richmond, NSW, Australia    | de Dios <i>et al.</i> , 2013  |
| Temperate broad-leaf evergreen | <i>Eucalyptus tereticornis</i>  | 65  | 1200  |    | Well watered | 0.51-1.27 | Li-6400           | gh | Richmond, NSW, Australia    | de Dios <i>et al.</i> , 2013  |
| Temperate broad-leaf evergreen | <i>Eucalyptus tereticornis</i>  | 12  | 250 † | 5  | 801 +19%     |           | Li-6400           | cg | Richmond, NSW, Australia    | Lewis <i>et al.</i> , 2011    |
| Temperate broad-leaf evergreen | <i>Eucalyptus tereticornis</i>  | 53  | 216   | 25 | Well watered |           | ssp               | gh | Sydney, NSW, Australia      | Zeppel unpublished            |
| Tropical broad-leaf evergreen  | <i>Eucalyptus tetradonta</i>    | 76  |       |    | Well watered |           | ssp               | gh | Sydney, NSW, Australia      | Zeppel unpublished            |

|                                        |                                     |      |        |       |              |           |         |       |                              |                                                                  |
|----------------------------------------|-------------------------------------|------|--------|-------|--------------|-----------|---------|-------|------------------------------|------------------------------------------------------------------|
| Tropical broad-leaf evergreen          | <i>Ficus insipida</i>               | 124  | 810    | 11*   | Well watered |           | Li-6400 | rs    | Gamboa, Republic of Panama   | Cernusak <i>et al.</i> , 2007                                    |
| Temperate broad-leaf deciduous         | <i>Fraxinus pennsylvanica</i>       | 1    | 10     | 10    |              | 0.4-1.2   | ssp     | f, op | New York Ciy, USA            | Whitlow <i>et al.</i> , 1992                                     |
| Temperate broad-leaf evergreen         | <i>Gaultheria shallon</i>           | 22   | 36-188 | 7-21* | 995          |           | Li-1600 | f     | Sonoma & Big Basin, USA      | Dawson <i>et al.</i> , 2007                                      |
| Crop                                   | <i>Glycine max</i> cultivar 'Bragg' | 80   |        |       | Well watered | 53-75% RH | dp      | f     | Narrabri, NSW, Australia     | Turner <i>et al.</i> , 1978, cited in Caird <i>et al.</i> , 2007 |
| Crop                                   | <i>Glycine max</i> cultivar 'Ruse'  | 140  |        |       | Well watered | 53-75% RH | dp      | f     | Narrabri, NSW, Australia     | Turner <i>et al.</i> , 1978, cited in Caird <i>et al.</i> , 2007 |
| CAM plant **                           | <i>Guzmania monostachia</i>         | 13   | 10 †   | 125   |              |           | ssp     | f     | Trinidad                     | Luttge <i>et al.</i> , 1986                                      |
| Crop                                   | <i>Helianthus annulus</i>           | 100  |        | 13    |              |           | Li-6400 | f     | California, USA              | Snyder <i>et al.</i> , 2003                                      |
| Crop                                   | <i>Helianthus annuus</i>            | 124  | 1385   | 9     | Well watered | 0.88-2.12 | Li-6400 | gh    | USA                          | Howard and Donovan, 2007                                         |
| C3 grass                               | <i>Helianthus anomalus</i>          | 166  | 771    | 22    | Well watered | 0.88-2.12 | Li-6400 | gh    | USA                          | Howard and Donovan, 2007                                         |
| C3 grass                               | <i>Helianthus anomalus</i>          | 83   | 963    | 9     | 298          |           | Li-6400 | f     | Utah, USA                    | Ludwig <i>et al.</i> , 2006                                      |
| C3 grass                               | <i>Helianthus deserticola</i>       | 225  | 837    | 27    | Well watered | 0.88-2.12 | Li-6400 | gh    | USA                          | Howard and Donovan, 2007                                         |
| C3 grass                               | <i>Helianthus petiolaris</i>        | 121  | 929    | 13    | Well watered | 0.88-2.12 | Li-6400 | gh    | USA                          | Howard and Donovan, 2007                                         |
| Temperate broad-leaf Shrub - evergreen | <i>Heteromeles arbutifolia</i>      | 0    | 21-277 | 0     | 1250         |           | Li-1600 | f     | Bolinas Ridge, USA           | Dawson <i>et al.</i> , 2007                                      |
| C4 grass                               | <i>Heteropogon contortus</i>        | 28   | 80     | 35    | 250-500      |           | Li-6400 | f     | North America, USA           | Ogle <i>et al.</i> , 2012                                        |
| Crop                                   | <i>Hibiscus cannabinus</i>          | 30   | 0.78   |       | Well watered |           | dp      | f     | Western Australia, Australia | Muchow <i>et al.</i> , 1980, cited in Caird <i>et al.</i> , 2007 |
| Temperate needle-leaf evergreen        | <i>Juniper monosperma</i>           | 8.7  |        |       | Ambient      |           | Li-1600 | f     | Los Alamos, New Mexico       | Zeppel unpublished                                               |
| Temperate broad-leaf shrub - deciduous | <i>Krameria parvifolia</i>          | 54.4 | 87     | 63    | 136          |           | Li-6400 | f     | North America, USA           | Ogle <i>et al.</i> , 2012                                        |
| C3 grass                               | <i>Lagurus ovatus</i>               | 59   | 879    | 7     |              |           | IRGA    | f     | Alcudia,                     | Press <i>et al.</i> , 1993                                       |

|                                         |                                |      |        |       |              |            |          |       |                          |                                                                     |
|-----------------------------------------|--------------------------------|------|--------|-------|--------------|------------|----------|-------|--------------------------|---------------------------------------------------------------------|
|                                         |                                |      |        |       |              |            |          |       | Mallorca                 |                                                                     |
| Temperate needle-leaf deciduous         | <i>Larix occidentalis</i>      | 42   |        |       | 812-1270     |            | Li-1600  | f     | Idaho, USA               | Kavanagh <i>et al.</i> , 2007                                       |
| Temperate broad-leaf Shrub - evergreen  | <i>Larrea tridentata</i>       | 9.3  | 21     | 43    | 365          |            | Li-6400  | f     | North America, USA       | Ogle <i>et al.</i> , 2012                                           |
| Temperate broad-leaf Shrub - evergreen  | <i>Larrea tridentata</i>       | 33   | 59     | 56    | 136          |            | Li-6400  | f     | North America, USA       | Ogle <i>et al.</i> , 2012                                           |
| C3 grass                                | <i>Leymus cinereus</i>         | 87   |        | 69    |              |            | Li-6400  | f     | California, USA          | Snyder <i>et al.</i> , 2003                                         |
| Temperate broad-leaf evergreen          | <i>Lithocarpus densiflora</i>  | 22   | 39-147 | 3-8*  | 1037         |            | Li-1600  | f     | Sonoma & Big Basin, USA  | Dawson <i>et al.</i> , 2007                                         |
| Temperate broad-leaf evergreen          | <i>Lithocarpus densiflora</i>  | 44   | 82-195 | 7-11* | 1037         |            | Li-1600  | f     | Sonoma & Big Basin, USA  | Dawson <i>et al.</i> , 2007                                         |
| Temperate broad-leaf shrub - deciduous  | <i>Lycium andersonii</i>       | 378  | 85     | 445   | 136          |            | Li-6400  | f     | North America, USA       | Ogle <i>et al.</i> , 2012                                           |
| Crop                                    | <i>Lycopersicon esculentum</i> | 37   |        |       | Well watered | 0.05 - 1.8 | Li-1600C | gh    | Netherlands              | Bakker 1991, cited in Caird <i>et al.</i> , 2007                    |
| Temperate broad-leaf deciduous          | <i>Malus domestica</i>         | 50   |        |       | 383- 1056    |            | dp       | f, gh | Ohio & Colorado, USA     | Barnard and Bauerle, 2013                                           |
| C3 grass                                | <i>Melilotus polymorpha</i>    | 160  | 586    | 27    |              |            | IRGA     | f     | Alcudia, Mallorca        | Press <i>et al.</i> , 1993                                          |
| crop                                    | <i>Nicotiniana glauca</i>      | 60   | 370    | 16    | Well watered |            | Li-6400  | gh    | Athens, USA              | Donovan <i>et al.</i> , 1999                                        |
| crop                                    | <i>Nicotiniana glauca</i>      | 40   | 110    | 36    | Well watered | 70% RH     | ge       | gc    | Japan                    | Takahashi <i>et al.</i> , 2005, cited in Caird <i>et al.</i> , 2007 |
| Tropical broad-leaf evergreen           | <i>Ouratea hexasperma</i>      | 55   | 103 †  | 53    | 1500         | 0.35-3.8   | ssp      | f     | Brasilia, Brasil         | Bucci <i>et al.</i> , 2004                                          |
| Tropical broad-leaf evergreen           | <i>Ouratea hexasperma</i>      | 60   | 130 †  | 46    | 1500         |            | ssp      | f     | Brasilia, Brasil         | Scholz <i>et al.</i> , 2007                                         |
| Temperate Annual Herb (Hemiparasite) ** | <i>Parentucellia viscosa</i>   | 1862 |        |       |              |            | IRGA     | f     | Alcudia, Mallorca        | Press <i>et al.</i> , 1993                                          |
| Temperate needle-leaf evergreen         | <i>Picea abies</i>             | 6    | 15     | 41    | Well watered |            | Li-1600  | oc    | Birmensdorf, Switzerland | Keller and Hasler 1984, cited in Caird <i>et al.</i> , 2007         |
| Temperate needle-leaf                   | <i>Pinon edulis</i>            | 10   |        |       |              |            |          |       |                          | Pangle pers comm                                                    |

|                                        |                                  |       |        |      |              |               |              |           |                                           |                                                                   |
|----------------------------------------|----------------------------------|-------|--------|------|--------------|---------------|--------------|-----------|-------------------------------------------|-------------------------------------------------------------------|
| evergreen                              |                                  |       |        |      |              |               |              |           |                                           |                                                                   |
| Temperate needle-leaf evergreen        | <i>Pinon edulus</i>              | 10    |        |      | Ambient      |               | Li-1600      | f         | Los Alamos, New Mexico                    | Zeppel unpublished                                                |
| Temperate needle-leaf evergreen        | <i>Pinus ponderosa</i>           | 4     |        |      | 1190         |               | Li-6400      | f         | New York, USA                             | Barbour <i>et al.</i> , 2005                                      |
| Temperate needle-leaf evergreen        | <i>Pinus ponderosa</i>           | 15    | 90     |      |              |               | Li-6400      | f         | San Bernardino Mountains, California, USA | Grulke <i>et al.</i> , 2004                                       |
| Temperate needle-leaf evergreen        | <i>Pinus radiata</i>             | 9     |        |      | 1190         |               | Li-6400      | f         | New York, USA                             | Barbour <i>et al.</i> , 2005                                      |
| Temperate needle-leaf evergreen        | <i>Pinus strobus</i>             | 25.05 | 52-222 | 2-17 | 1470         |               | Li-1600      | f         | Upstate New York, USA                     | Dawson <i>et al.</i> , 2007                                       |
| Temperate needle-leaf evergreen        | <i>Pinus sylvestris</i>          | 80    |        |      |              |               | Gas exchange | f         |                                           | Skarby <i>et al.</i> , 1987                                       |
| CAM plant **                           | <i>Plectranthus marrubioides</i> | 13    |        |      | Well watered |               | ge           | gh, gc    | Germany                                   | Herppich, 1997                                                    |
| C4 grass                               | <i>Pleuraphis rigida</i>         | 349   | 91     | 386  | 136          |               | Li-6400      | f         | North America, USA                        | Ogle <i>et al.</i> , 2012                                         |
| Temperate broad-leaf deciduous         | <i>Populus angustifolia</i>      | 188   | 900    | 21   | Well watered | night-0.5-0.3 | Li-6400      | gh        | USA                                       | Howard and Donovan, 2010                                          |
| Temperate broad-leaf deciduous         | <i>Populus balsamifera</i>       | 308   | 1074   | 29   | Well watered | night-0.5-0.4 | Li-6400      | gh        | USA                                       | Howard and Donovan, 2010                                          |
| Temperate broad-leaf deciduous         | <i>Populus balsamifera</i>       | 153   |        | 60   |              |               | Li-6400      | f         | California, USA                           | Snyder <i>et al.</i> , 2003                                       |
| Temperate broad-leaf deciduous         | <i>Populus koreana</i>           | 230   | 480    |      | Well watered | 0.95          | ssp          | gh, gc, f | Japan                                     | Furukawa <i>et al.</i> , 1990 cited in Caird <i>et al.</i> , 2007 |
| Temperate needle-leaf deciduous        | <i>Pseudotsuga menziesii</i>     | 29    |        |      | 812-1270     |               | Li-1600      | f         | Idaho, USA                                | Kavanagh <i>et al.</i> , 2007                                     |
| Temperate broad-leaf shrub - deciduous | <i>Purshia tridentata</i>        | 95    | 136    | 70   | 200          |               | Li-6400      | f         | North America, USA                        | Ogle <i>et al.</i> , 2012                                         |
| Temperate broad-leaf shrub –           | <i>Purshia tridentata</i>        | 41    |        | 47   |              |               | Li-6400      | f         | California, USA                           | Snyder <i>et al.</i> , 2003                                       |

|                                        |                                |      |        |      |                      |          |         |    |                               |                                                      |
|----------------------------------------|--------------------------------|------|--------|------|----------------------|----------|---------|----|-------------------------------|------------------------------------------------------|
| deciduous                              |                                |      |        |      |                      |          |         |    |                               |                                                      |
| Tropical broad-leaf deciduous          | <i>Qualea grandiflora</i>      | 158  | 263 †  | 60   | 1500                 |          | ssp     | f  | Brasilia, Brasil              | Scholz <i>et al.</i> , 2007                          |
| Temperate broad-leaf deciduous         | <i>Quercus afares</i>          | 20.2 | 234    | 9    | Well watered         | 0.97     | Li-6400 | gh | France                        | Vialet-Chabrand and Dreyer, 2013                     |
| Temperate broad-leaf evergreen         | <i>Quercus agrifolia</i>       | 9.5  | 15-183 | 0-2* | 1250                 |          | Li-1600 | f  | Tonzi Ranch, USA              | Dawson <i>et al.</i> , 2007                          |
| Temperate broad-leaf evergreen         | <i>Quercus oleoides</i>        | 9.2  | 82     | 11   | Well watered         |          | Li-6400 | gh | Franklinville, New York, USA  | Cavender-Bares <i>et al.</i> , 2007                  |
| Temperate broad-leaf deciduous         | <i>Quercus petraea</i>         | 17.4 | 141    | 12   | Well watered         | 0.97     | Li-6400 | gh | France                        | Vialet-Chabrand and Dreyer, 2013                     |
| Temperate broad-leaf deciduous         | <i>Quercus robur</i>           | 9.9  | 284    | 3    | Well watered         | 0.97     | Li-6400 | gh | France                        | Vialet-Chabrand and Dreyer, 2013                     |
| Temperate broad-leaf deciduous         | <i>Quercus rubra</i>           | 11   | 300    | 4    | 1190                 |          | Li-6400 | f  | New York, USA                 | Barbour <i>et al.</i> , 2005                         |
| Temperate broad-leaf deciduous         | <i>Quercus rubra</i>           | 40   | 276 †  | 14   | 2550 (snow and rain) |          | Li-6400 | f  | Petersham, Massachusetts, USA | Daley and Phillips, 2006                             |
| Temperate broad-leaf deciduous         | <i>Quercus suber</i>           | 5.8  | 316    | 2    | Well watered         | 0.97     | Li-6400 | gh | France                        | Vialet-Chabrand and Dreyer, 2013                     |
| Temperate broad-leaf evergreen         | <i>Quintinia acutifolia</i>    | 15   |        |      | 1190                 |          | Li-6400 | f  | New York, USA                 | Barbour <i>et al.</i> , 2005                         |
| Temperate broad-leaf Shrub - evergreen | <i>Rhamnus californica</i>     | 40   | 33-190 | 3-8* | 1250                 |          | Li-1600 | f  | Bolinas Ridge, USA            | Dawson <i>et al.</i> , 2007                          |
| Tropical broad-leaf evergreen          | <i>Ricinus communis</i>        | 240  | 1800 † | 13   | Well watered         | 0.66     | Li-6400 | gc | Australia                     | Barbour and Buckley, 2007                            |
| Crop                                   | <i>Rosa cultivar 'Madelon'</i> | 21   | 92     | 23   |                      | 70% RH   | Li-1600 | gh | Wageningen, Netherlands       | Blom-Zandstra <i>et al.</i> , 1995                   |
| Crop                                   | <i>Rosa cultivar 'Sonia'</i>   | 18   | 112 †  | 16   |                      | 70% RH   | Li-1600 | gh | Wageningen, Netherlands       | Blom-Zandstra <i>et al.</i> , 1995                   |
| Temperate broad-leaf shrub - deciduous | <i>Rosa woodsii</i>            | 37   |        | 26   |                      |          | Li-6400 | f  | California, USA               | Snyder <i>et al.</i> , 2003                          |
| Tropical broad-leaf deciduous          | <i>Roupala montana</i>         | 100  | 193 †  | 52   | 1500                 | 0.35-3.8 | ssp     | f  | Brasilia, Brasil              | Bucci <i>et al.</i> , 2004                           |
| Boreal broad-leaf deciduous            | <i>Salix arctica</i>           | 50   | 163 †  |      | 199-603              |          | ge      | f  | Canadian Arctic Archipelago   | Dawson and Bliss, 1989 in Caird <i>et al.</i> , 2007 |
| Temperate broad-leaf shrub - deciduous | <i>Salix exigua</i>            | 79   |        | 18   |                      |          | Li-6400 | f  | California, USA               | Snyder <i>et al.</i> , 2003                          |

|                                        |                                                   |       |        |       |                |            |          |        |                            |                                                     |
|----------------------------------------|---------------------------------------------------|-------|--------|-------|----------------|------------|----------|--------|----------------------------|-----------------------------------------------------|
| Temperate broad-leaf shrub - deciduous | <i>Sarcobatus vermiculatus</i>                    | 60    | 330 †  | 18    | 163            |            | Li-6400  | f      | Mono Lake, California, USA | Donovan et al., 2003                                |
| Temperate broad-leaf shrub - deciduous | <i>Sarcobatus vermiculatus</i>                    | 390   | 520    | 75    | Well watered   |            | Li-6400  | gh     | Athens, USA                | Donovan et al., 1999                                |
| Temperate broad-leaf shrub - deciduous | <i>Shepherdia argentea</i>                        | 33    |        | 28    |                |            | Li-6400  | f      | California, USA            | Snyder et al., 2003                                 |
| Crop                                   | <i>Solanum melongena</i>                          | 170   |        |       | Well watered   | 0.05 - 1.8 | Li-1600C | gh     | Netherlands                | Bakker 1991, cited in Caird et al., 2007            |
| Crop                                   | <i>Solanum tuberosum</i>                          | 230   |        |       |                |            | ge       | gc     |                            | Goknur and Tibbit, 1984 cited in Caird et al., 2007 |
| Tropical broad-leaf evergreen          | <i>Styrax ferrugineus</i>                         | 75    | 164 †  | 46    | 1500           | 0.35-3.8   | ssp      | f      | Brasilia, Brazil           | Bucci et al., 2004                                  |
| Temperate needle-leaf deciduous        | <i>Tamarix chinensis</i>                          | 35    | 148 †  | 24    | not reported   |            | Li-6400  | f      | New Mexico & Texas, USA    | Moore et al., 2007                                  |
| Temperate needle-leaf evergreen        | <i>Thuja plicata</i>                              | 10    |        |       | 812-1270       |            | Li-1600  | f      | Idaho, USA                 | Kavanagh et al., 2007                               |
| Temperate broad-leaf deciduous         | <i>Tilia cordata</i>                              | 1     | 8      | 13    |                | 0.4-1.2    | ssp      | f, op  | New York City, USA         | Whitlow et al., 1992                                |
| Tropical broad-leaf evergreen          | <i>Toona australis</i>                            | 12.9  | 252    | 5     | Well watered   |            | ssp      | gh     | Sydney, NSW, Australia     | Zeppel unpublished                                  |
| Temperate needle-leaf evergreen        | <i>Tsuga heterophylla</i>                         | 20    |        |       | 812-1270       |            | Li-1600  | f      | Idaho, USA                 | Kavanagh et al., 2007                               |
| Temperate broad-leaf evergreen         | <i>Umbrellularia californica</i>                  | 11    | 52-178 | 1-5*  | 1037           |            | Li-1600  | f      | Big Basin, USA             | Dawson et al., 2007                                 |
| Temperate broad-leaf Shrub - evergreen | <i>Vaccinium spp</i>                              | 34.75 | 37-209 | 7-22* | 1470           |            | Li-1600  | f      | Upstate New York, USA      | Dawson et al., 2007                                 |
| Crop                                   | <i>Vicia faba</i>                                 | 80    | 500 †  | 16    | Well watered   | 60-70% RH  | Li-6400  | gc     | Davis, California, USA     | Easlon and Richards, 2009                           |
| Crop                                   | <i>Vitis vinifera</i>                             | 36.7  | 198    | 19    | Well watered   | 0.17-1.97  | Li-6400  | op     | Australia                  | Rogiers and Clarke, 2013                            |
| Crop                                   | <i>Vitis vinifera Cultivar Cabernet Sauvignon</i> | 23.3  |        |       | Field capacity | 0.2-0.9    | Li-6400  | gh, op | Balearic Islands, Spain    | Escalona et al., 2013                               |
| Crop                                   | <i>Vitis vinifera Cultivar</i>                    | 11.3  |        |       | Field          | 0.2-       | Li-6400  | gh, op | Balearic Islands,          | Escalona et al., 2013                               |

|                                |                                                       |      |  |  |                |          |         |        |                         |                               |
|--------------------------------|-------------------------------------------------------|------|--|--|----------------|----------|---------|--------|-------------------------|-------------------------------|
|                                | <i>Grenache</i>                                       |      |  |  | capacity       | 0.10     |         |        | Spain                   |                               |
| Crop                           | <i>Vitis vinifera</i> Cultivar <i>Malvasia</i>        | 23   |  |  | Field capacity | 0.2-0.11 | Li-6400 | gh, op | Balearic Islands, Spain | Escalona <i>et al.</i> , 2013 |
| Crop                           | <i>Vitis vinifera</i> Cultivar <i>Manto Escursach</i> | 8.9  |  |  | Field capacity | 0.2-0.12 | Li-6400 | gh, op | Balearic Islands, Spain | Escalona <i>et al.</i> , 2013 |
| Crop                           | <i>Vitis vinifera</i> Cultivar <i>Manto Negro</i>     | 9.7  |  |  | Field capacity | 0.2-0.13 | Li-6400 | gh, op | Balearic Islands, Spain | Escalona <i>et al.</i> , 2013 |
| Crop                           | <i>Vitis vinifera</i> Cultivar <i>Pinot Noir</i>      | 13.8 |  |  | Field capacity | 0.2-0.14 | Li-6400 | gh, op | Balearic Islands, Spain | Escalona <i>et al.</i> , 2013 |
| Crop                           | <i>Vitis vinifera</i> Cultivar <i>Tempranillo</i>     | 16.5 |  |  | Field capacity | 0.2-0.15 | Li-6400 | gh, op | Balearic Islands, Spain | Escalona <i>et al.</i> , 2013 |
| Temperate broad-leaf evergreen | <i>Weinmannia racemosa</i>                            | 11   |  |  | 1190           |          | Li-6400 | f      | New York, USA           | Barbour <i>et al.</i> , 2005  |

## References

- Bakker JC (1991) Leaf conductance of four glasshouse vegetable crops as affected by air humidity. *Agricultural and Forest Meteorology*, **55**, 23-36.
- Barbour MM, Buckley TN (2007) The stomatal response to evaporative demand persists at night in *Ricinus communis* plants with high nocturnal conductance. *Plant, Cell & Environment*, **30**, 711-721.
- Barbour MM, Cernusak LA, Whitehead D, Griffin KL, Turnbull MH, Tissue DT, Farquhar GD (2005) Nocturnal stomatal conductance and implications for modelling delta O-18 of leaf-respired CO2 in temperate tree species. *Functional Plant Biology*, **32**, 1107-1121.
- Barnard DM, Bauerle WL (2013) The implications of minimum stomatal conductance on modeling water flux in forest canopies. *Journal of Geophysical Research-Biogeosciences*, **118**, 1322-1333.
- Benyon RG (1999) Nighttime water use in an irrigated *Eucalyptus grandis* plantation. *Tree Physiology*, **19**, 853-859.
- Blom-Zandstra M, Pot CS, Maas FM, Schapendonk AHCM (1995) Effects of different light treatments on the nocturnal transpiration and dynamics of stomatal closure of two Rose cultivars. *Scientia Horticulturae*, **61**, 251-262.
- Bucci SJ, Scholz FG, Goldstein G, Meinzer FC, Hinojosa JA, Hoffmann WA, Franco AC (2004) Processes preventing nocturnal equilibration between leaf and soil water potential in tropical savanna woody species. *Tree Physiology*, **24**, 1119-1127.
- Cavender-Bares J, Sack L, Savage J (2007) Atmospheric and soil drought reduce nocturnal conductance in live oaks. *Tree Physiology*, **27**, 611-620.
- Cernusak LA, Winter K, Aranda J, Turner BL, Marshall JD (2007) Transpiration efficiency of a tropical pioneer tree (*Ficus insipida*) in relation to soil fertility. *Journal of Experimental Botany*, **58**, 3549-3566.
- Daley MJ, Phillips NG (2006) Interspecific variation in nighttime transpiration and stomatal conductance in a mixed New England deciduous forest. *Tree Physiology*, **26**, 411-419.
- Dawson T, Bliss LC (1989) Patterns of water use and the tissue water relations in the dioecious shrub, *Salix arctica*: the physiological basis for habitat partitioning between the sexes. *Oecologia*, **79**, 332-343.
- Dawson TE, Burgess SSO, Tu KP *et al.* (2007) Nighttime transpiration in woody plants from contrasting ecosystems. *Tree Physiology*, **27**, 561-575.
- De Dios VR, Turnbull MH, Barbour MM, Onteddu J, Ghannoum O, Tissue DT (2013) Soil phosphorous and endogenous rhythms exert a larger impact than CO2 or temperature on nocturnal stomatal conductance in *Eucalyptus tereticornis*. *Tree Physiology*, **33**, 1206-1215.

- Donovan LA, Grisé DJ, West JB, Pappert RA, Alder NN, Richards JH (1999) Predawn disequilibrium between plant and soil water potentials in two cold-desert shrubs. *Oecologia*, **120**, 209-217.
- Donovan LA, Richards JH, Linton MJ (2003) Magnitude and mechanisms of disequilibrium between predawn plant and soil water potentials. *Ecology*, **84**, 463-470.
- Easlon HM, Richards JH (2009) Photosynthesis affects following night leaf conductance in *Vicia faba*. *Plant Cell and Environment*, **32**, 58-63.
- Escalona JM, Fuentes S, Tomas M, Martorell S, Flexas J, Medrano H (2013) Responses of leaf night transpiration to drought stress in *Vitis vinifera* L. *Agricultural Water Management*, **118**, 50-58.
- Franco AC, Ball E, Lüttge U (1990) Patterns of Gas Exchange and Organic Acid Oscillations in Tropical Trees of the Genus *Clusia*. *Oecologia*, **85**, 108-114.
- Furukawa A, Park SY, Fujinuma Y (1990) Hybrid poplar stomata unresponsive to changes in environmental-conditions. *Trees-Structure and Function*, **4**, 191-197.
- Goknur AB, Tibbitts TW (1984) Dark opening of stomata as related to so2 sensitivity of potatoes. *Hortscience*, **19**, 548-548.
- Gulke NE, Alonso R, Nguyen T, Cascio C, Dobrowolski W (2004) Stomata open at night in pole-sized and mature ponderosa pine: implications for O3 exposure metrics. *Tree Physiology*, **24**, 1001-1010.
- Herppich WB (1997) Stomatal responses to changes in air humidity are not necessarily linked to nocturnal CO2 uptake in the CAM plant *Plectranthus marruboides* Benth. (Lamiaceae). *Plant, Cell & Environment*, **20**, 393-399.
- Howard AR, Donovan LA (2007) Helianthus nighttime conductance and transpiration respond to soil water but not nutrient availability. *Plant Physiology*, **143**, 145-155.
- Howard AR, Donovan LA (2010) Soil nitrogen limitation does not impact nighttime water loss in *Populus*. *Tree Physiology*, **30**, 23-31.
- Kavanagh KL, Pangle R, Schotzko AD (2007) Nocturnal transpiration causing disequilibrium between soil and stem predawn water potential in mixed conifer forests of Idaho. *Tree Physiology*, **27**, 621-629.
- Keller T, Häslér R (1984) The influence of a fall fumigation with ozone on the stomatal behavior of spruce and fir. *Oecologia*, **64**, 284-286.
- Lasceve G, Leymarie J, Vavasseur A (1997) Alterations in light-induced stomatal opening in a starch-deficient mutant of *Arabidopsis thaliana* L deficient in chloroplast phosphoglucosyltransferase activity. *Plant Cell and Environment*, **20**, 350-358.
- Lewis JD, Phillips NG, Logan BA, Hricko CR, Tissue DT (2011) Leaf photosynthesis, respiration and stomatal conductance in six *Eucalyptus* species native to mesic and xeric environments growing in a common garden. *Tree Physiology*, **31**, 997-1006.
- Leymarie J, Lasceve G, Vavasseur A (1998) Interaction of stomatal responses to ABA and CO<sub>2</sub> *Arabidopsis thaliana*. *Functional Plant Biology*, **25**, 785-791.
- Ludwig F, Jewitt RA, Donovan LA (2006) Nutrient and water addition effects on day- and night-time conductance and transpiration in a C-3 desert annual. *Oecologia*, **148**, 219-225.
- Lüttge U, Stimmel KH, Smith JaC, Griffiths H (1986) Comparative ecophysiology of CAM and C3 bromeliads. II. Field measurements of gas exchange of CAM bromeliads in the humid tropics. *Plant, Cell & Environment*, **9**, 377-383.
- Matyssek R, Günthardt-Goerg MS, Maurer S, Keller T (1995) Nighttime exposure to ozone reduces whole-plant production in *Betula pendula*. *Tree Physiology*, **15**, 159-165.
- Moore GW, Cleverly JR, Owens MK (2008) Nocturnal transpiration in riparian *Tamarix* thickets authenticated by sap flux, eddy covariance and leaf gas exchange measurements. *Tree Physiology*, **28**, 521-528.
- Muchow R, Fisher M, Ludlow M, Myers R (1980) Stomatal Behaviour of Kenaf and Sorghum in a Semiarid Tropical Environment. II. During the Day. *Functional Plant Biology*, **7**, 621-628.
- Ogle K, Lucas RW, Bentley LP *et al.* (2012) Differential daytime and night-time stomatal behavior in plants from North American deserts. *New Phytologist*, **194**, 464-476.
- Phillips NG, Lewis JD, Logan BA, Tissue DT (2010) Inter- and intra-specific variation in nocturnal water transport in *Eucalyptus*. *Tree Physiology*, **30**, 586-596.
- Press MC, Parsons AN, Mackay AW, Vincent CA, Cochrane V, Seel WE (1993) Gas-exchange characteristics and nitrogen relations of 2 mediterranean root hemiparasites - *bartsia-trixago* and *parentucellia-viscosa*. *Oecologia*, **95**, 145-151.
- Rogiers SY, Clarke SJ (2013) Nocturnal and daytime stomatal conductance respond to root-zone temperature in 'Shiraz' grapevines. *Annals of Botany*, **111**, 433-444.

- Scholz FG, Bucci SJ, Goldstein G, Meinzer FC, Franco AC, Miralles-Wilhelm F (2007) Removal of nutrient limitations by long-term fertilization decreases nocturnal water loss in savanna trees. *Tree Physiology*, **27**, 551-559.
- Skarby L, Troeng E, Bostrom CA (1987) Ozone uptake and effects on transpiration, net photosynthesis, and dark respiration in scots pine. *Forest Science*, **33**, 801-808.
- Snyder KA, Richards JH, Donovan LA (2003) Night-time conductance in C3 and C4 species: do plants lose water at night? *Journal of Experimental Botany*, **54**, 861-865.
- Takahashi M, Konaka D, Sakamoto A, Morikawa H (2005) Nocturnal uptake and assimilation of nitrogen dioxide by C3 and CAM plants. *Zeitschrift Fur Naturforschung C-a Journal of Biosciences*, **60**, 279-284.
- Turner NC, Begg JE, Rawson HM, English SD, Hearn AB (1978) Agronomic and physiological responses of soybean and sorghum crops to water deficits part 3 components of leaf water potential leaf conductance carbon-14 di oxide photosynthesis and adaptation to water deficits. *Australian Journal of Plant Physiology*, **5**, 179-194.
- Vialet-Chabrand S, Dreyer E, Brendel O (2013) Performance of a new dynamic model for predicting diurnal time courses of stomatal conductance at the leaf level. *Plant Cell and Environment*, **36**, 1529-1546.
- Whitlow TH, Bassuk NL, Reichert DL (1992) A 3-year study of water relations of urban street trees. *Journal of Applied Ecology*, **29**, 436-450.
- Zeppel MJB, Lewis JD, Chaszar B, Smith RA, Medlyn BE, Huxman TE, Tissue DT (2012) Nocturnal stomatal conductance responses to rising CO2 , temperature and drought. *New Phytologist*, **193**, 929-938.
